# Supplementary material for: Leaf wax n -alkanes in modern plants and topsoils from easternGeorgia (Caucasus) – implications for reconstructing regional paleovegetation
Source: Copernicus journal article supplement (doi:10.5194/bg-2017-277), 2017-07-14
Supplement: Supplementary file 1 [file SOM-1_sample location.xlsx]

## Sheet: Sample location
SOM-1: Geographical data and site characterization for sample locations (grass = grassland; dec = deciduous forest; N = North; E = East; S = South; W = West)
Location	Vegetation	Characterization	Latitude N	Longitude E	Exposition	Inclination (°)	Altitude (m a.s.l.)
1	grass	steppe, poaceae	41°42.733	45°03.961	NNE	1	742
2	grass	cultivated grassland, cropland	41°42.618	45°06.346	NNE	1	809
3	dec	forest, hornbeam	41°45.249	45°08.094	NEE	10	924
4	grass	cultivated grassland, grazing	41°45.160	45°08.527	SE	4	871
5	dec	forest, hornbeam	41°48.082	45°09.180	N	14	830
6	grass	grassland, meadow	41°51.182	45°08.358	flat	flat	887
7	grass	grassland, meadow	41°51.593	45°14.046	W	5	1199
9	grass	cultivated grassland, grazing	41°51.974	45°16.729	flat	flat	1659
10	grass	cultivated grassland, grazing	42°02.293	45°16.292	flat	flat	485
16	dec	forest, hornbeam	42°15.711	45°20.352	SE	30	990
20	dec	forest, hornbeam	42°13.182	45°18.658	S	21	790
21	grass	cultivated grassland, grazing	42°09.418	45°17.883	SSE	2	645
22	grass	cultivated grassland, grazing	42°08.034	45°17.404	SW	9	622
23	dec	forest in patches, hornbeam	42° 11.665	45° 19.385	S	6	759
24	grass	grassland, meadow	42°10.224	45°19.564	W	3	748
25	grass	grassland, meadow	42°03.221	45°10.578	S	1	570
29	dec	forest, hasel, hornbeam…	42°07.351	45°07.159	ENE	14	774
30	dec	forest, hornbeam	42°05.715	45°06.529	SSE	21	728
31	grass	grassland, meadow	42°05.384	45°06.505	E	5	705
32	grass	grassland, meadow, Artemisia	42°04.205	45°06.284	ENE	6	685
34	grass	cultivated grassland, grazing	42°02.205	45°21.564	flat	flat	445
35	dec	forest, hornbeam	42°04.331	45°03.317	NE	10	1174
