# Supplementary material for: Leaf wax n -alkanes in modern plants and topsoils from easternGeorgia (Caucasus) – implications for reconstructing regional paleovegetation
Source: Copernicus journal article supplement (doi:10.5194/bg-2017-277), 2017-07-14
Supplement: Supplementary file 3 [file SOM-2_site description.xlsx]

## Sheet: Site description
SOM-2: Description of the sampled sides with photographs
grassland sites
1	steppe, poaceae
2	cultivated grassland, cropland
4	cultivated grassland, grazing
6	grassland, meadow
7	grassland, meadow
9	cultivated grassland, grazing
10	cultivated grassland, grazing
21	cultivated grassland, grazing
22	cultivated grassland, grazing
24	grassland, meadow
25	grassland, meadow
31	grassland, meadow
32	grassland, meadow, Artemisia
34	cultivated grassland, grazing
deciduous sites:
3	forest, hornbeam
5	forest, hornbeam
16	forest, hornbeam
20	forest, hornbeam
23	forest in patches, hornbeam
29	forest, hasel, hornbeam…
30	forest, hornbeam
35	forest, hornbeam	no photo
